# Supplementary material for: One-Step Preparation of Si-Doped Ultra-Long β-Ga2O3 Nanowires by Low-Pressure Chemical Vapor Deposition
Source: MDPI journal article supplement (doi:10.3390/cryst13060898), 2023-05-31
Supplement: s1 [file s1]

Archive with 1 entries (1 files):
- crystals-2395623-supplementary.pdf
